# Supplementary material
Source: Springer Nature journal article supplement (https://www.springermedizin.de/resource/supplementary/12992_2012_187_MOESM4_ESM.pdf/9616772)
Supplement: MOESM4 [file 9616772]

Millions of U.S. Dollars, Constant 2009 Prices

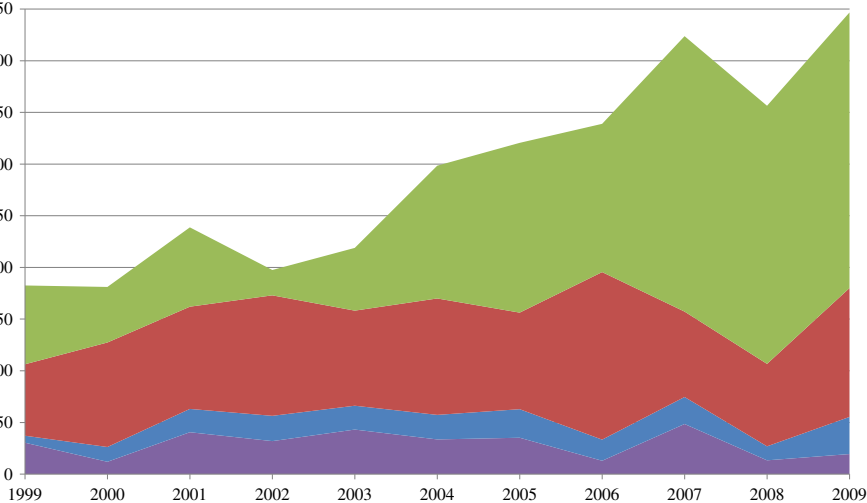

- General Budget Support
- Sector Budget Support through PAF
- Project Support on MTEF
- Off-Budget Project Support
